# Supplementary material for: Examining Transcranial Direct-Current Stimulation (tDCS) as a Treatment for Hallucinations in Schizophrenia
Source: Atypon-hosted journal article supplement (doi:10.1176/appi.ajp.2012.11071091), 2012-05-11

## CONSORT Flow Diagram for Study of Transcranial Direct-Current Stimulation (tDCS) in Schizophrenia

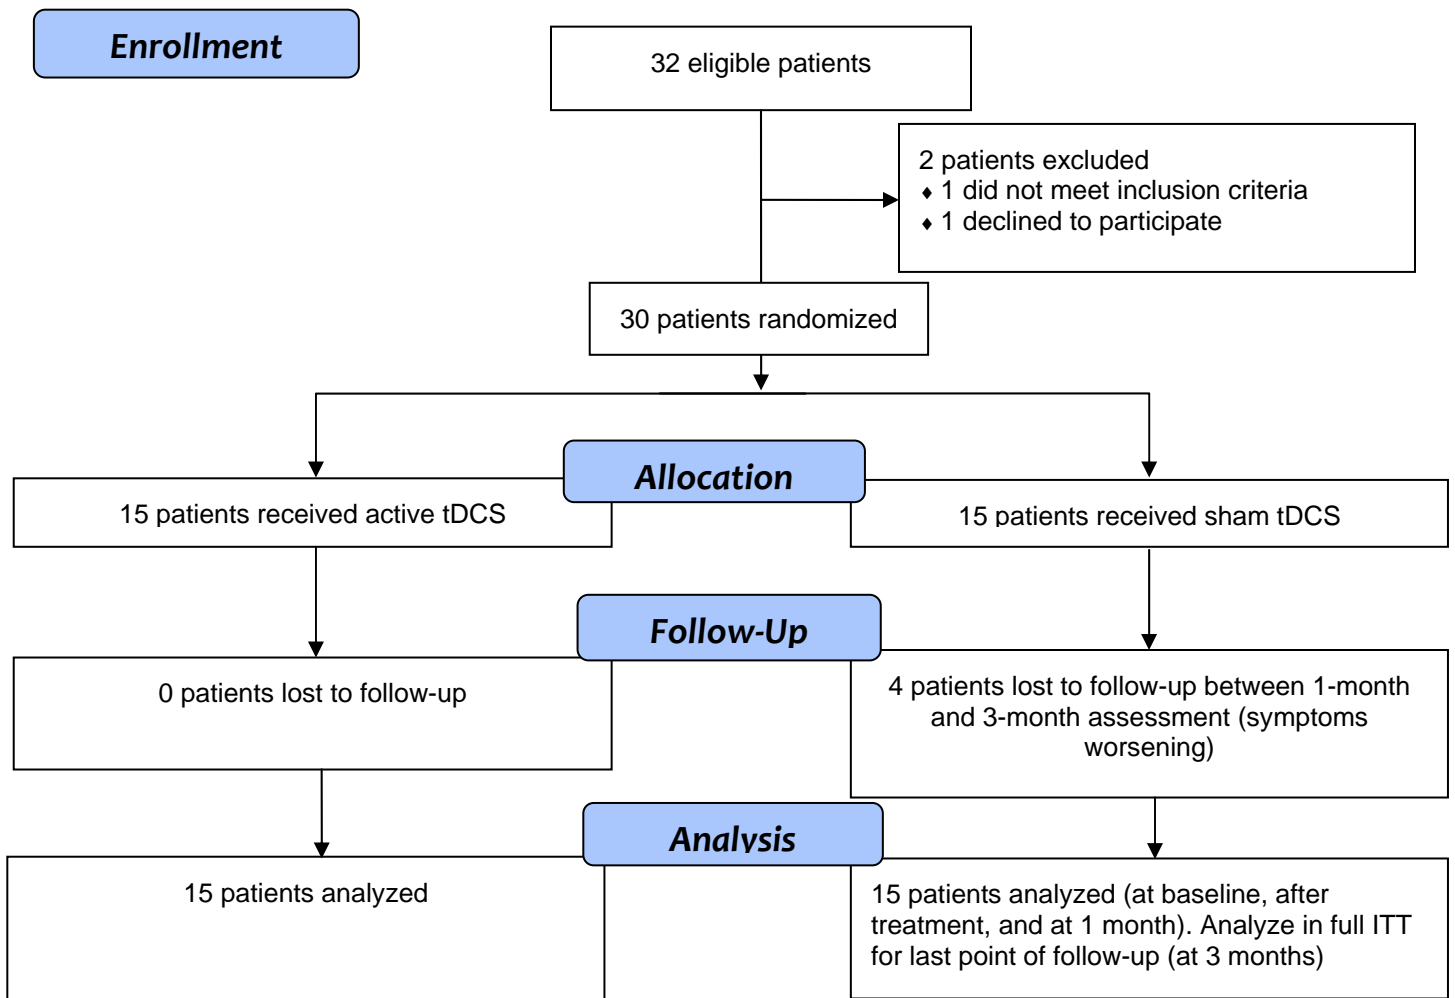

Supplement: appi.ajp.2012.11071091.ds001.pdf [file appi.ajp.2012.11071091.ds001.pdf]
